# Supplementary material for: High Resolution Chemical Stratigraphies of Atmospheric Depositions from a 4 m Depth Snow Pit at Dome C (East Antarctica)
Source: MDPI journal article supplement (doi:10.3390/atmos12070909), 2021-07-14
Supplement: s1 [file s1]

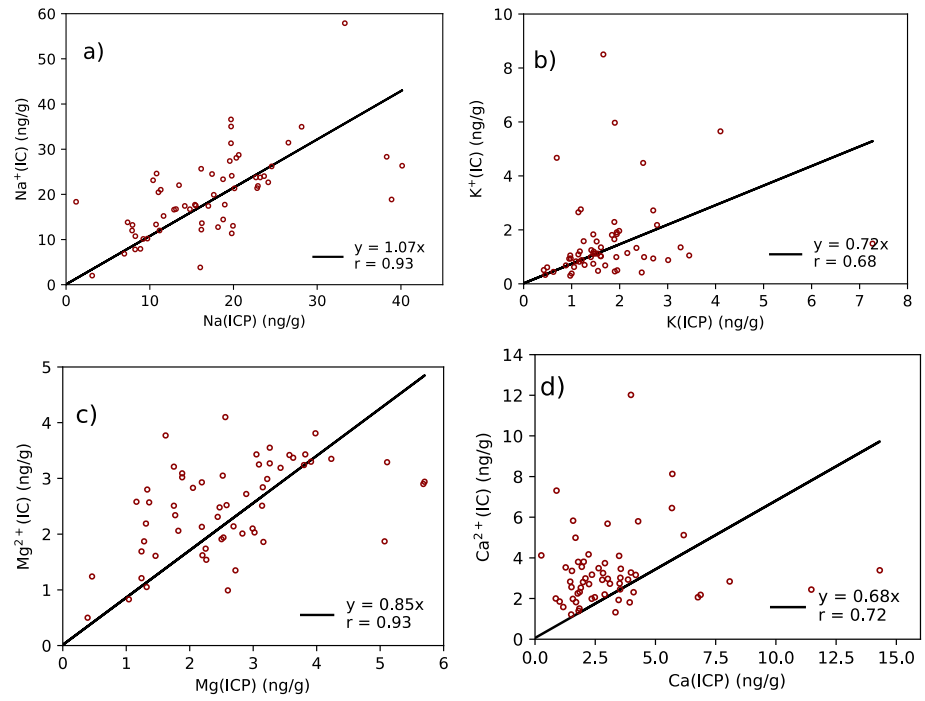

**Figure S1.** Scatter plots for Na vs. Na<sup>+</sup> (a), K vs. K<sup>+</sup> (b), Mg vs. Mg<sup>2+</sup> (c) and Ca vs. Ca<sup>2+</sup> (d) data. Regression line was forced through zero.
